# Supplementary material
Source: PubMed Central journal article supplement (PMC9525282)
Supplement: 41422_2022_697_MOESM1_ESM.pdf [file 41422_2022_697_MOESM1_ESM.pdf]

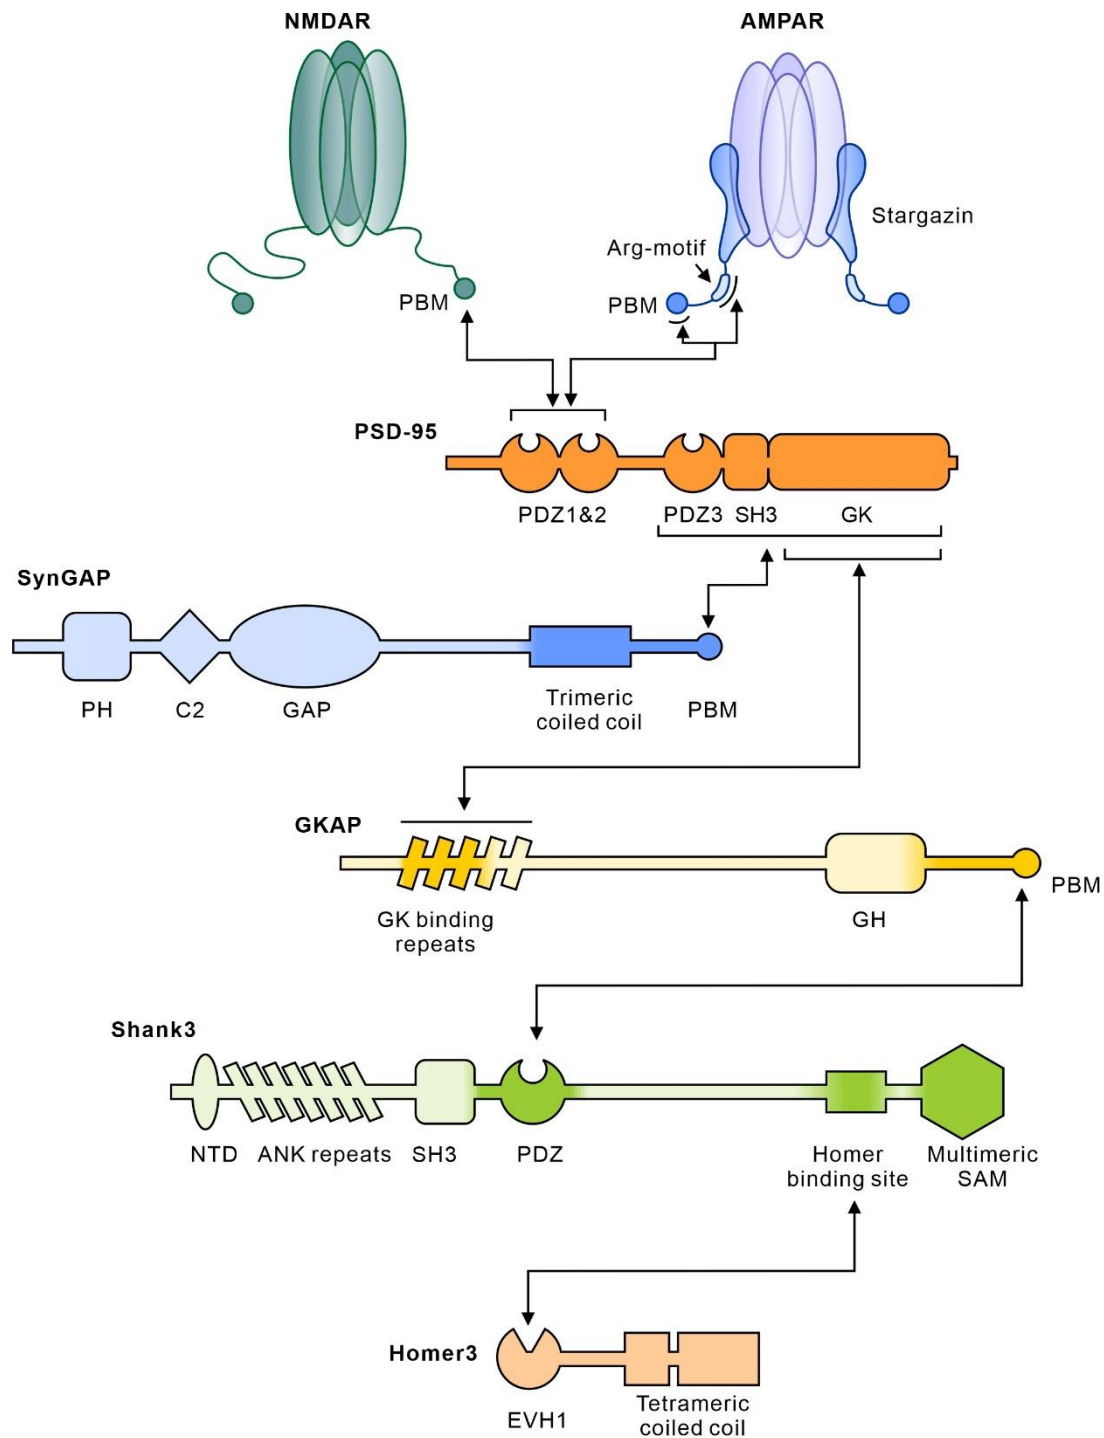

**Supplementary information, Fig. S1: Molecular assemble of the PSD proteins network.**

The scheme shows the domain organizations of each key PSD components and the interaction network formed by these PSD proteins. Domains drawn in dark colors for SynGAP, GKAP, and Shank3 represent the domains in each protein were included in the recombinant proteins in the current study. PSD-95 and Homer3 are full-length proteins. Lines with two-way arrows indicate specific pairwise interactions between PSD proteins.
