# Supplementary material
Source: PubMed Central journal article supplement (PMC9525282)
Supplement: 41422_2022_697_MOESM2_ESM.pdf [file 41422_2022_697_MOESM2_ESM.pdf]

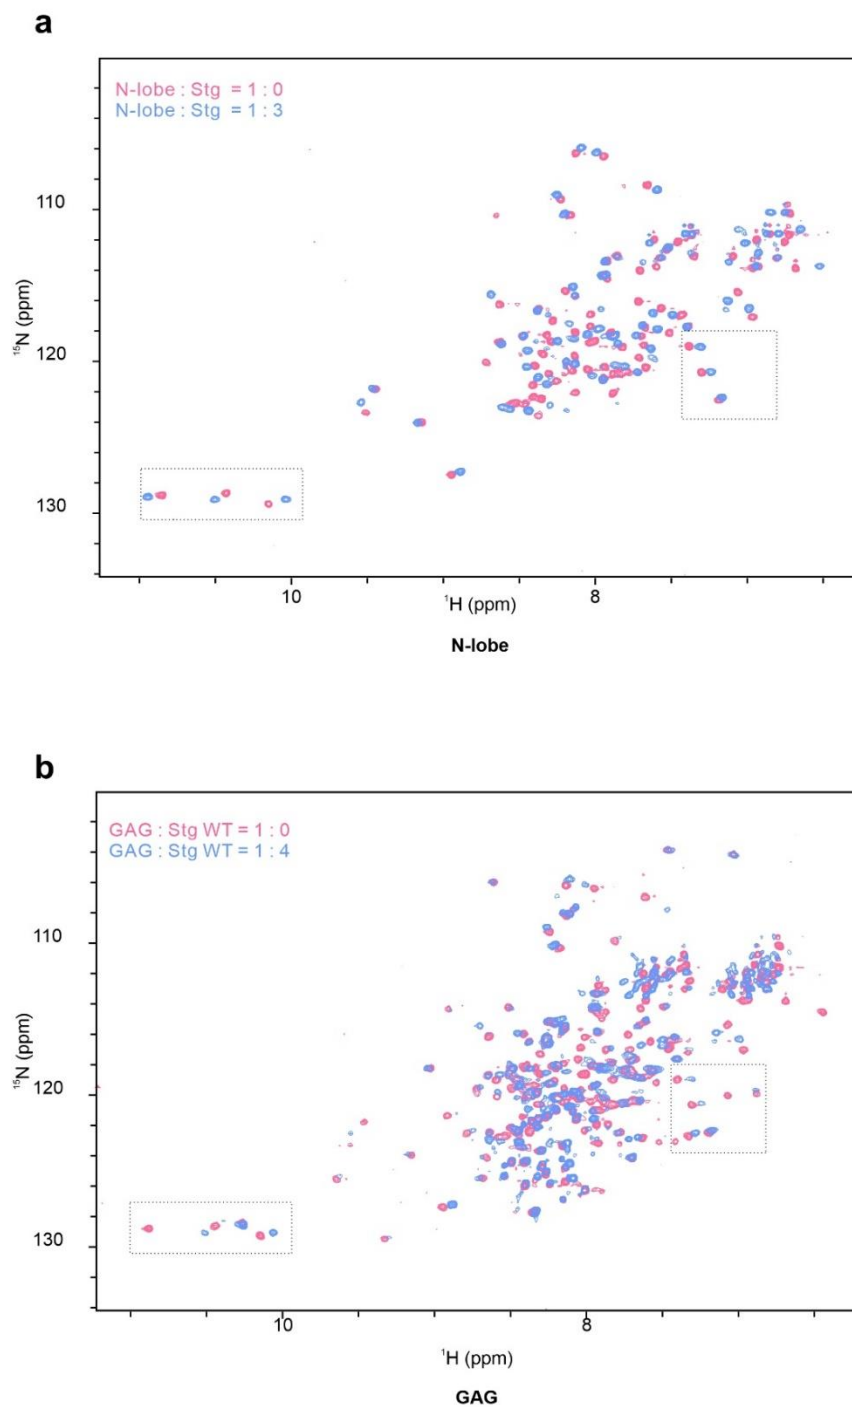

**Supplementary information, Fig. S2: NMR-based study of the binding of Stg to the N-lobe of GAG or to the intact GAG domain of Arc.**

- a**, An overlay plot of the  $^1\text{H}$ ,  $^{15}\text{N}$ -HSQC spectra of  $^{15}\text{N}$ -labeled GAG N-lobe alone (0.1 mM) (pink) and with the presence of 3 molar ratio amount of unlabeled Stg (blue) (Also see Fig. 2c).
- b**, An overall plot of the  $^1\text{H}$ ,  $^{15}\text{N}$ -HSQC spectra of  $^{15}\text{N}$ -labeled GAG domain alone (0.1 mM) (pink), and with the presence of 4 molar ratio amount of unlabeled Stg (blue) (Also see Fig. 2d).
