# Supplementary material
Source: PubMed Central journal article supplement (PMC9525282)
Supplement: 41422_2022_697_MOESM3_ESM.pdf [file 41422_2022_697_MOESM3_ESM.pdf]

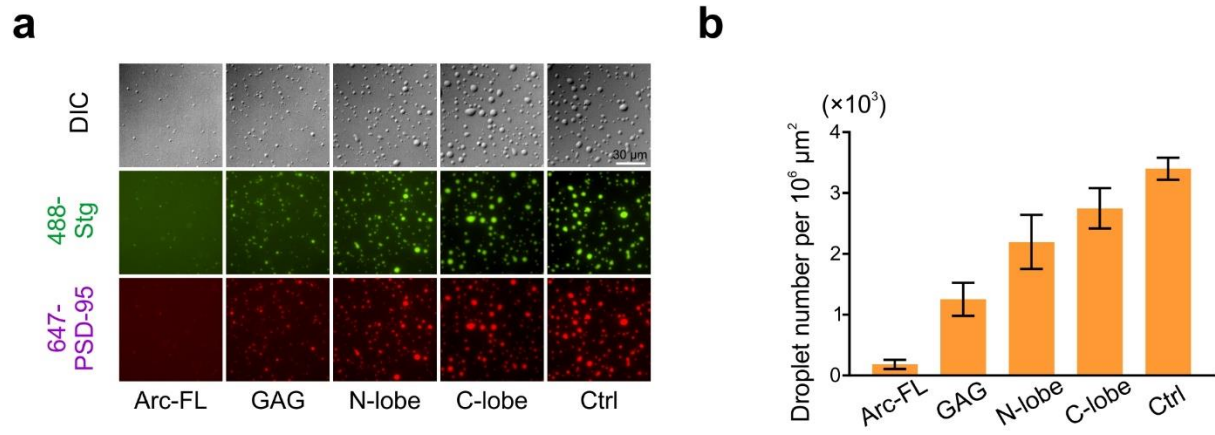

**Supplementary information, Fig. S3: Dissecting dispersal ability of Arc truncates.**

- a**, images showing phase separation of PSD-95 and Stg in the presence of Arc truncated elements.
- b**, quantification results of droplet density and presented as mean  $\pm$  SD.
