# Supplementary material
Source: PubMed Central journal article supplement (PMC9525282)
Supplement: 41422_2022_697_MOESM4_ESM.pdf [file 41422_2022_697_MOESM4_ESM.pdf]

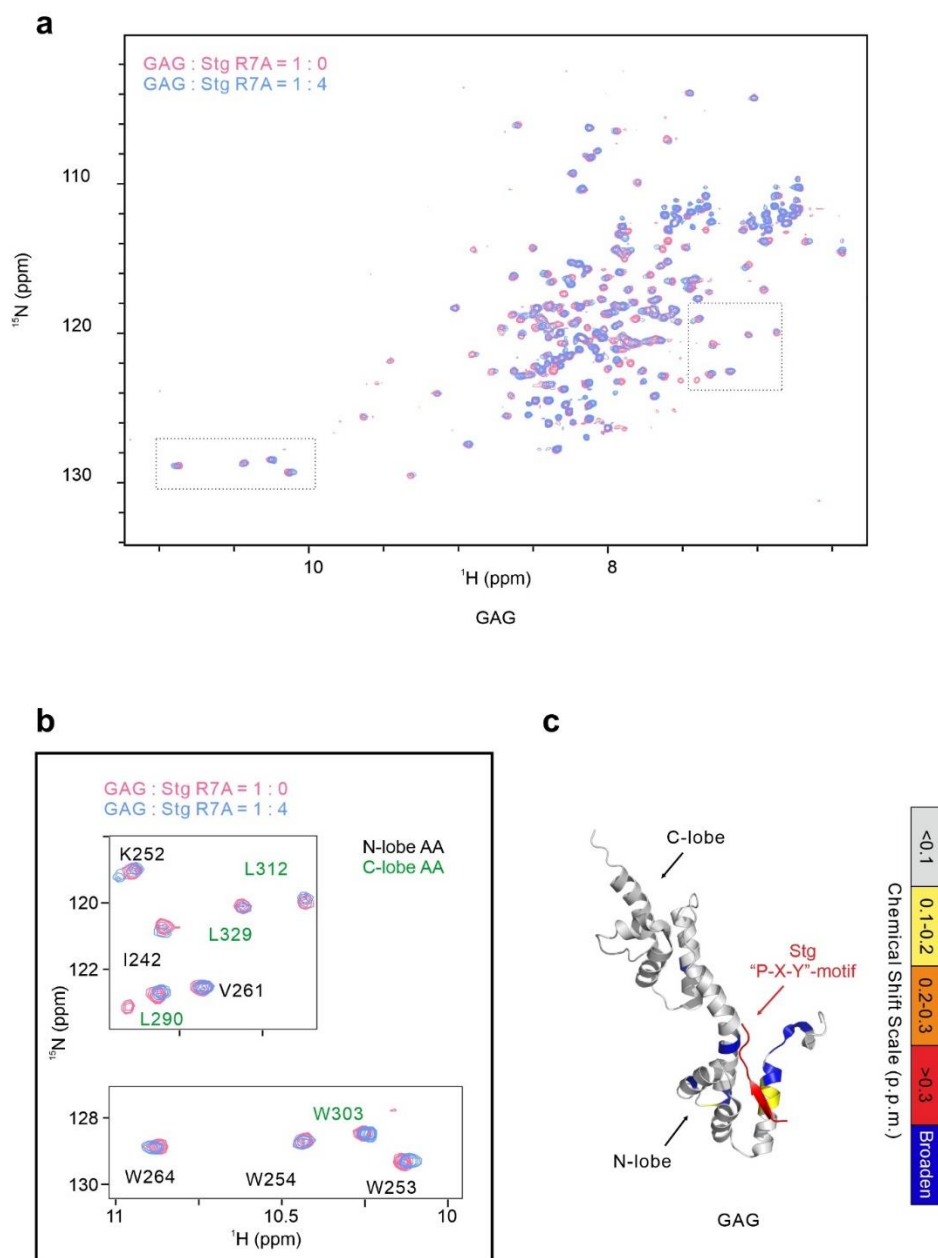

**Supplementary information, Fig. S4: NMR-based study of the interaction between Stg R7A and the Arc GAG domain**

- a**, An overlay plot of  $^1\text{H}$ ,  $^{15}\text{N}$ -HSQC spectra of Arc GAG along (0.1 mM) (pink) and the protein with the presence of 4 molar ratio amount of unlabeled Stg R7A (blue).
- b**, Two selected regions of the overlaid  $^1\text{H}$ ,  $^{15}\text{N}$ -HSQC spectra in panel A, with the residue assignment labeled. The chemical shift assignment of Arc GAG is adapted from an earlier study (Nielsen et al, 2019).
- c**, Mapping of the backbone amide chemical shift changes of GAG induced by Stg R7A binding to the structure of the GAG domain. In this representation, the combined  $^1\text{H}$  and  $^{15}\text{N}$  chemical shift changes are defined as:  $\Delta_{\text{p.p.m.}} = [(\Delta\delta_{\text{HN}})^2 + (\Delta\delta_{\text{N}} \times \alpha_{\text{N}})^2]^{1/2}$ , where  $\Delta\delta_{\text{HN}}$  and  $\Delta\delta_{\text{N}}$  represent chemical shift differences of amide proton and nitrogen chemical shifts of each residue of the GAG domain with and without the presence of Stg R7A. The scaling factor ( $\alpha_{\text{N}}$ ) used to normalize the  $^1\text{H}$  and  $^{15}\text{N}$  chemical shifts is 0.17.
