# Supplementary material
Source: PubMed Central journal article supplement (PMC9525282)
Supplement: 41422_2022_697_MOESM8_ESM.pdf [file 41422_2022_697_MOESM8_ESM.pdf]

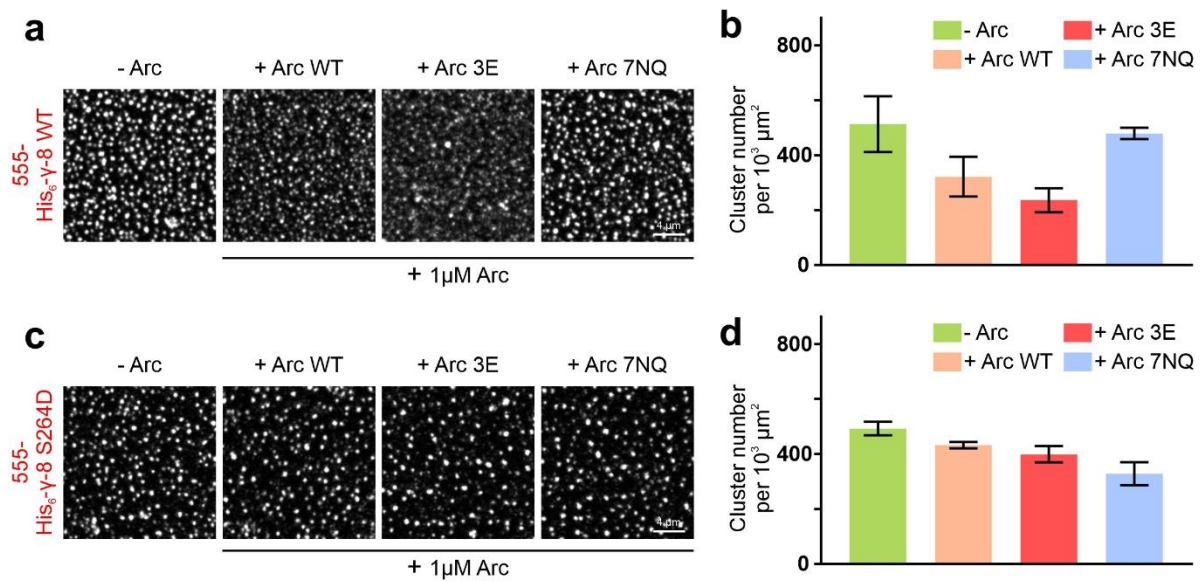

### Supplementary information, Fig. S8: Arc disperses TARP\_γ-8 clustering on membranes

- Confocal microscope images showing the membrane clustering of  $\gamma$ -8 WT induced by the PSD condensates in the presence of Arc WT, Arc 3E and Arc 7NQ, respectively. Protein concentrations were used identically as Fig. 5.
- Quantification showing the numbers of  $\gamma$ -8 clusters on SLBs in the presence of Arc WT or its variants. Results were from 3 independent batches of imaging assays and presented as mean  $\pm$  SD.
- Confocal microscope images showing the membrane clustering of  $\gamma$ -8 S264D induced by the PSD condensates in the presence of Arc WT, Arc 3E and Arc 7NQ, respectively.
- Quantification showing the numbers of  $\gamma$ -8 S264D clusters in the presence of Arc WT or its variants. Results were from 3 independent batches of imaging assays and presented as mean  $\pm$  SD.
