# Supplementary material
Source: PubMed Central journal article supplement (PMC9525282)
Supplement: 41422_2022_697_MOESM9_ESM.pdf [file 41422_2022_697_MOESM9_ESM.pdf]

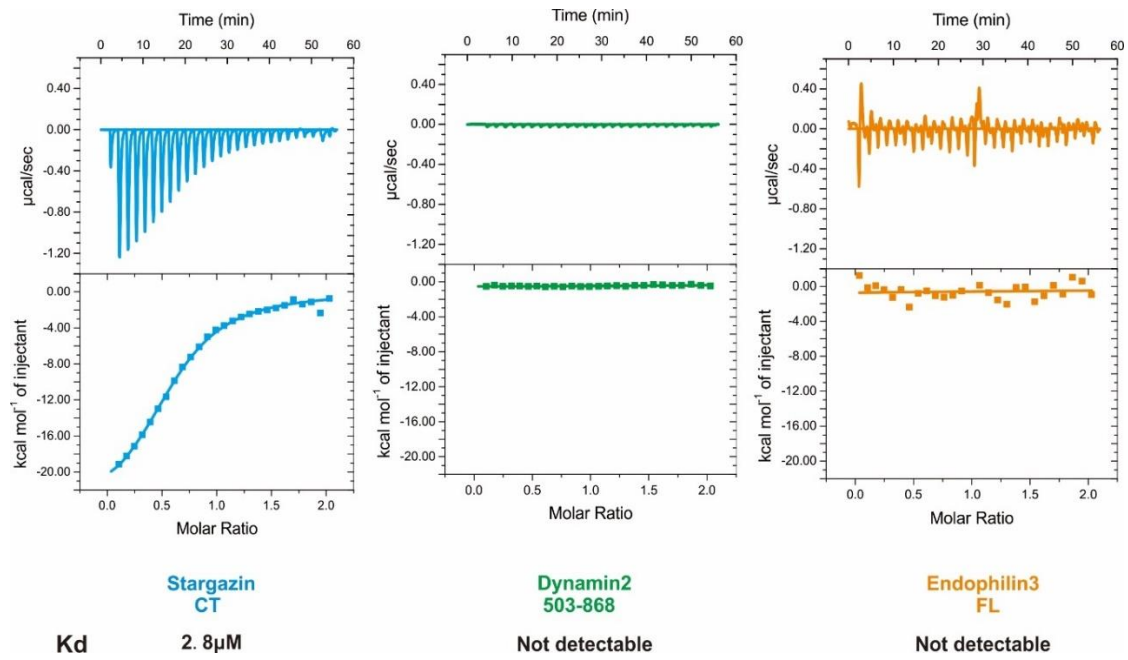

**Supplementary information, Fig. S9: ITC measurement detecting binding between GAG domain of Arc and Stargazin CT/ Dynamin2/ Endophilin3.**  $200 \mu\text{M}$  Stg-CT, Dynamin2 (a.a. 503-868) or Endophilin3 in the syringe was titrated to  $20 \mu\text{M}$  GAG domain of Arc.
