# Supplementary material
Source: PubMed Central journal article supplement (PMC9525282)
Supplement: 41422_2022_697_MOESM10_ESM.pdf [file 41422_2022_697_MOESM10_ESM.pdf]

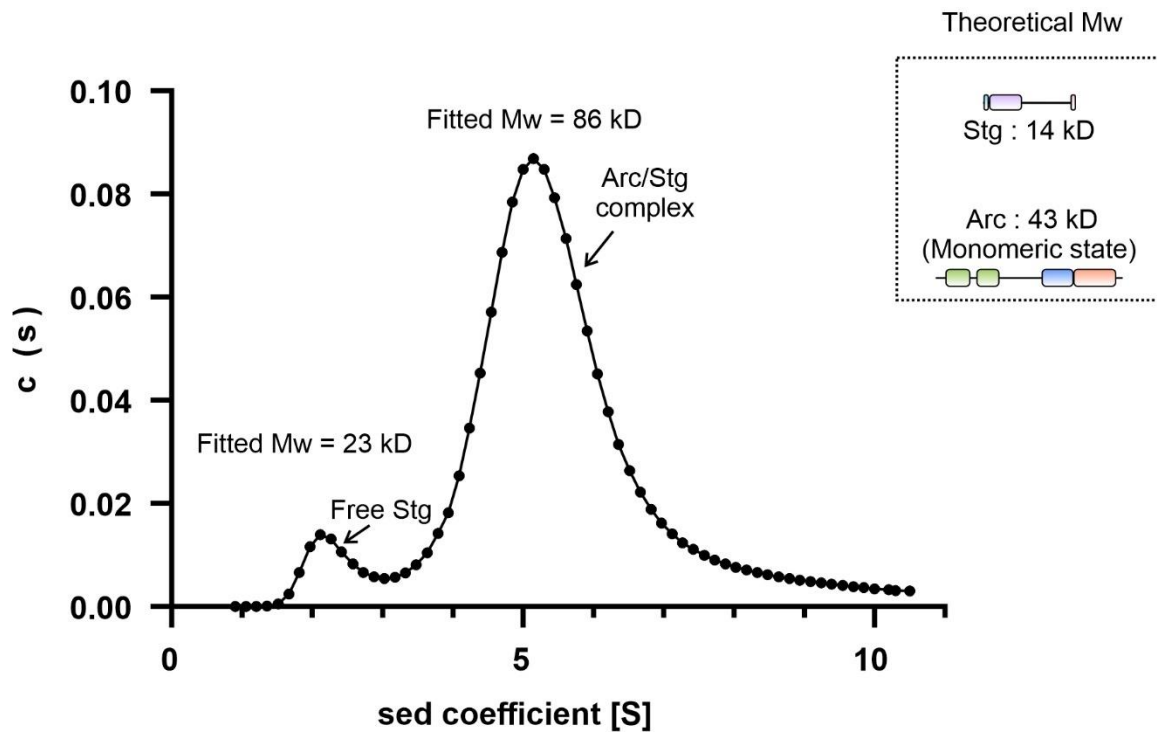

**Supplementary information, Fig. S10: Arc and Stg do not form high ordered protein assembly.** The analytical ultracentrifugation analysis showing the Arc and Stg failed to form large protein assembly. 5  $\mu$ M Arc was mixed with 15  $\mu$ M Stg. The fitted molecular masses are shown in plot, and theoretical molecular masses are presented in the box.
